## Monotherapy versus combination therapy for sepsis due to multidrug-resistant *Acinetobacter baumannii*: analysis of a multicentre prospective cohort

L. E. López-Cortés<sup>1\*</sup>, J. M. Cisneros<sup>1,2</sup>, F. Fernández-Cuenca<sup>1</sup>, G. Bou<sup>3</sup>, M. Tomás<sup>3</sup>, J. Garnacho-Montero<sup>2,4</sup>, A. Pascual<sup>1,5</sup>, L. Martínez-Martínez<sup>6,7</sup>, J. Vila<sup>8</sup>, J. Pachón<sup>1,2,9</sup> and J. Rodríguez Baño<sup>1,9</sup> on behalf of the GEIH/REIPI-Ab2010 Group†

<sup>1</sup>Unidad Clínica de Enfermedades Infecciosas, Microbiología y Medicina Preventiva, Hospitales Universitarios Virgen Macarena y Virgen del Rocío, Sevilla, Spain; <sup>2</sup>Instituto de Biomedicina de Sevilla (IBIS), Sevilla, Spain; <sup>3</sup>Servicio de Microbiología, Complejo Hospitalario Universitario A Coruña, La Coruña, Spain; <sup>4</sup>Unidad de Medicina Intensiva, Hospital Universitario Virgen del Rocío, Sevilla, Spain; <sup>5</sup>Departamento de Microbiología, Universidad de Sevilla, Sevilla, Spain; <sup>6</sup>Servicio de Microbiología, Hospital Universitario Marqués de Valdecilla, Santander, Spain; <sup>7</sup>Departamento de Biología Molecular, Universidad de Cantabria, Santander, Spain; <sup>8</sup>Barcelona Centre for International Health Research (CRESIB, Hospital Clínic-Universitat de Barcelona), Barcelona, Spain; <sup>9</sup>Departamento de Medicina, Universidad de Sevilla, Sevilla, Spain

\*Corresponding author. Fax: +34 955926552; E-mail: luislopezcortes@gmail.com  
†Other members of the GEIH/REIPI-Ab2010 Group are listed in the Acknowledgements section.

Received 18 March 2014; returned 23 April 2014; revised 24 May 2014; accepted 27 May 2014

**Background:** Treatment of multidrug-resistant *Acinetobacter baumannii* (MDRAB) infection presents a challenge because of the scarcity of available options. Even though combination therapy (CT) is frequently used in clinical practice, data are needed to support its use instead of monotherapy (MT).

**Methods:** A prospective observational study was conducted in 28 Spanish hospitals. Patients with sepsis caused by MDRAB, defined according to strict criteria, and who received active antibiotic treatment (according to *in vitro* susceptibility testing) for at least 48 h, were included. The main outcome variable was all-cause 30 day mortality after initiation of targeted therapy. Multivariate analysis, including a propensity score (for receiving CT), was performed by Cox regression.

**Results:** One hundred and one patients were included in the analysis; 68 (67.3%) received MT and 33 (32.7%) received CT. Pneumonia was the most common infection (50.5%), 68.6% of cases being associated with mechanical ventilation. Colistin (67.6%) and carbapenems (14.7%) were the most common drugs used in MT; colistin plus tigecycline (27.3%) and carbapenem plus tigecycline (12.1%) were the most frequent combinations. Crude 30 day mortality was 23.5% and 24.2% for the MT and CT groups, respectively (RR=1.03; 95% CI 0.49–2.16; *P*=0.94). Multivariate analysis of 30 day survival showed no trend towards reduced 30 day mortality with CT (HR=1.35; 95% CI 0.53–3.44; *P*=0.53). Subgroup analysis showed similar results.

**Conclusions:** Our data do not support an association of CT with reduced mortality in MDRAB infections. More data for specific types of infection and combinations are needed.

**Keywords:** *A. baumannii*, combination treatment, antimicrobial resistance, healthcare-associated infections, nosocomial pneumonia

### Introduction

During the last decade, the rate of nosocomial infections caused by multidrug-resistant *Acinetobacter baumannii* (MDRAB) has increased in several areas of the world.<sup>1–3</sup> According to European surveillance data from 2009, *Acinetobacter* spp. were implicated in up to 21.8%, 17.1% and 11.9% of episodes of intensive care unit (ICU)-acquired pneumonia, ICU-acquired bloodstream infections and ICU-acquired urinary tract infections, respectively.<sup>3</sup> Data from a systematic review showed that attributable mortality

in patients with infections ranged from 7% to 23% in ICU patients and from 10% to 43% in patients on conventional wards.<sup>4</sup>

Carbapenems and sulbactam are the usually recommended drugs for the treatment of invasive infections.<sup>1–3,5</sup> However, resistance to carbapenems has been increasing over the last decade. The best treatment for infections caused by carbapenem-resistant isolates has not been established. Observational data have suggested that colistin monotherapy (MT) is as effective as carbapenems against carbapenem-susceptible isolates,<sup>6,7</sup> although suboptimal dosing of colistin and the presence of

heteroresistant strains (>40% in some studies) may be associated with a higher rate of treatment failure.<sup>8</sup> The objective of this study was to assess the clinical efficacies of MT and combination therapy (CT) in MDRAB sepsis.

## Methods

### Study design and patients

A prospective observational study was conducted in 28 Spanish hospitals, 21 of them with >500 beds, between 1 February and 31 March 2010. Adult

patients (>18 years) from whom *A. baumannii* was isolated in any clinical sample, identified by daily review of microbiology reports at the participating centres, were eligible. We included those who met the following criteria: (i) an infection caused by *A. baumannii* was diagnosed (see definition below); (ii) sepsis criteria were present; and (iii) the patient received treatment with at least one drug active *in vitro* for at least 48 h following the clinical diagnosis of infection. Exclusion criteria included missing data on treatment, <30 days of follow-up, and patients treated in MT with antibiotics not considered first-line for the specific infection, such as aminoglycosides (except for urinary tract infection or tigecycline for patients with pneumonia or urinary tract infection).<sup>9–11</sup> Treatments were decided by

**Table 1.** Features of patients with MDRAB infection

| Variable                                              | All patients (n=101) | MT (n=68)  | CT (n=33)  | P    |
|-------------------------------------------------------|----------------------|------------|------------|------|
| Age (years), median (IQR)                             | 60 (52–75)           | 60 (49–74) | 61 (64–77) | 0.41 |
| Female                                                | 38 (37.6)            | 24 (35.3)  | 14 (42.4)  | 0.49 |
| Comorbidities                                         |                      |            |            |      |
| diabetes mellitus                                     | 20 (19.8)            | 11 (16.2)  | 9 (27.3)   | 0.19 |
| chronic pulmonary disease                             | 14 (13.9)            | 8 (11.8)   | 6 (18.2)   | 0.38 |
| malignancy                                            | 16 (15.8)            | 15 (22.1)  | 1 (3)      | 0.01 |
| dialysis treatment                                    | 3 (3)                | 1 (1.5)    | 2 (6.1)    | 0.20 |
| immunodeficiency                                      | 22 (21.8)            | 17 (25)    | 5 (15.2)   | 0.26 |
| Age-weighted Charlson comorbidity index, median (IQR) | 3 (2–6)              | 3 (2–7)    | 3 (2–6)    | 0.45 |
| Pitt score, median (IQR)                              | 4 (1–6)              | 4 (1–6)    | 4 (0–6)    | 0.68 |
| Present ICU admission                                 | 63 (62.4)            | 43 (63.2)  | 20 (60.6)  | 0.80 |
| Predisposing factors                                  |                      |            |            |      |
| mechanical ventilation                                | 49 (48.5)            | 32 (47.1)  | 17 (51.5)  | 0.67 |
| central venous catheter                               | 72 (71.3)            | 49 (72.3)  | 23 (69.7)  | 0.81 |
| major surgery                                         | 33 (32.7)            | 23 (33.8)  | 10 (30.3)  | 0.72 |
| previous antibiotic treatment                         | 87 (86.1)            | 57 (83.8)  | 30 (90.9)  | 0.33 |
| Severe sepsis or septic shock                         | 42 (41.6)            | 30 (44.1)  | 12 (36.4)  | 0.46 |
| Hospital-acquired <sup>a</sup>                        | 91 (90.1)            | 62 (91.2)  | 29 (87.9)  | 0.60 |
| Previous hospital stay, median (IQR)                  | 12 (7–21)            | 12 (6–23)  | 11 (7–19)  | 0.47 |
| Source of infection                                   |                      |            |            |      |
| respiratory tract <sup>b</sup>                        | 61 (60.4)            | 40 (58.8)  | 21 (63.6)  | 0.64 |
| skin and soft tissue                                  | 13 (12.9)            | 8 (11.8)   | 4 (12.1)   | 0.96 |
| urinary tract                                         | 10 (9.9)             | 9 (13.2)   | 1 (3)      | 0.11 |
| intra-abdominal                                       | 8 (7.9)              | 6 (8.8)    | 2 (6.1)    | 0.63 |
| others <sup>c</sup>                                   | 9 (8.9)              | 5 (7.4)    | 4 (12.1)   | 0.87 |
| Ventilator-associated pneumonia                       | 35 (34.7)            | 21 (30.9)  | 14 (42.4)  | 0.25 |
| Polymicrobial infection                               | 44 (43.6)            | 30 (44.1)  | 14 (42.4)  | 0.87 |
| Bacteraemia                                           | 42 (41.6)            | 24 (35.3)  | 18 (54.5)  | 0.07 |
| Susceptibility profile                                |                      |            |            |      |
| MDR                                                   | 101 (100)            | 68 (100)   | 33 (100)   | 1.0  |
| XDR                                                   | 5 (4.9)              | 3 (4.4)    | 2 (6.1)    | 0.73 |
| carbapenem-resistant                                  | 64 (64)              | 44 (64.7)  | 20 (60.6)  | 0.83 |
| susceptible only to colistin and tigecycline          | 21 (20.8)            | 17 (25)    | 4 (12.1)   | 0.14 |
| susceptible only to colistin                          | 5 (5)                | 3 (4.4)    | 2 (6.1)    | 0.72 |
| Inadequate empirical treatment                        | 53 (52.5)            | 35 (51.5)  | 18 (54.5)  | 0.77 |

Data are expressed as number of cases (%) except where specified.

<sup>a</sup>Healthcare-related infections include tracheobronchitis (one case), pneumonia (two cases), skin and soft tissue infection (three cases), urinary tract infection (one case), primary bacteraemia (one case), intra-abdominal infection (one case) and osteoarticular infection (one case).

<sup>b</sup>Pneumonia (51 cases) and tracheobronchitis (10 cases).

<sup>c</sup>CNS infection (one case), osteoarticular infection (one case), primary bacteraemia (five cases) and catheter-related bacteraemia (two cases).

the physicians in charge of the patients. The study was approved by the ethics committee of the Hospital Universitario Virgen Macarena; the need to obtain informed consent was waived given the observational nature of the study.

### Variables and definitions

The main outcome variable was all-cause 30 day mortality after the initiation of targeted therapy. As a secondary endpoint, all-cause 14 day mortality was assessed. Therapy with a single antimicrobial agent active *in vitro* was considered to be MT and therapy with two or more active drugs was considered to be CT. Based on previous data,<sup>12-15</sup> any bitherapy that included a carbapenem that was not active *in vitro* was considered as MT when the carbapenem MIC was  $\geq 32$  mg/L and as CT when it was lower. For patients whose targeted therapy changed during the course of treatment, we considered only the regimen that was used for at least 50% of the overall treatment duration; if two regimens were used for 50% of the duration, the first administered was chosen.

Acquisition of sepsis was classified as community associated, health-care associated or nosocomial, following Friedman's criteria.<sup>16</sup> The sources of sepsis were defined according to CDC definitions,<sup>17</sup> modified to ensure that isolation of *A. baumannii* did not represent colonization. In summary, non-sterile samples should fulfil standard criteria for quality, and quantitative cultures were used. The thresholds for considering lower respiratory tract infection were  $\geq 10^3$ ,  $\geq 10^5$  and  $\geq 10^6$  cfu/mL in protected brush, bronchoalveolar lavage and tracheal aspirate, respectively. Pneumonia, intra-abdominal infections and bacteraemic infections were considered high-risk infection types because they were associated with higher mortality in previous studies.<sup>17-19</sup> The following data were recorded: demographics; comorbidities; severity of underlying condition according to the age-weighted Charlson comorbidity index;<sup>20</sup> neutropenia (granulocyte count  $< 500$ /mL); immune depression (chemotherapy, radiotherapy, immunosuppressive disease and/or immunosuppressive drugs); recent invasive procedures; acute severity of illness at presentation according to the Pitt score;<sup>21</sup> previous or present ICU admission; and antimicrobial treatments. Empirical therapy was considered inappropriate if no *in vitro* active drug was administered during the first 24 h.

Presentation with sepsis was defined according to standard criteria.<sup>22</sup> This analysis was reported following the STROBE recommendations.<sup>23</sup>

### Microbiological data

As previously reported,<sup>24</sup> all isolates presumptively identified as *A. baumannii* by local laboratories were sent to a reference laboratory for definitive identification and antimicrobial susceptibility testing by microdilution, following CLSI recommendations;<sup>25</sup> for rifampicin, the Comité de l'Antibiogramme de la Société Française de Microbiologie breakpoint<sup>26</sup> was applied; for sulbactam and tigecycline, isolates with MIC  $> 8$  and  $> 1$  mg/L, respectively, were considered non-susceptible. Isolates were classified as multidrug resistant (MDR), extensively drug resistant (XDR) and pandrug resistant (PDR) according to Magiorakos *et al.*<sup>27</sup>

### Statistical analysis

Univariate comparisons were performed using the  $\chi^2$  or Fisher's test for qualitative variables, and Student's *t*-test or the Mann-Whitney *U*-test for continuous variables, as appropriate. Because of the limited number of events, multiple multivariate analyses were performed using Cox regression. Variables were selected using a backward stepwise procedure; *P* values  $< 0.2$  and  $< 0.1$  were used as cut-offs for including variables in or deleting them from the models, respectively. Effect modifications between the exposure of interest and other variables were investigated. A propensity score (PS; the probability of receiving CT) for receiving CT was calculated using a non-parsimonious multivariate logistic regression model for which the outcome variable was use of CT, and included in the models. Variables considered as potentially influencing the prescription of CT included: hospital stay; current or previous ICU admission; duration of previous hospitalization; XDR isolate; age; immunosuppression; cancer; dialysis; mechanical ventilation; prior antibiotic therapy; severe sepsis or septic shock at the time of diagnosis; polymicrobial infection; type of acquisition; source; and bacteraemic infection. This model showed a *P* value of 0.21 with the Hosmer-Lemeshow goodness-of-fit test and an area under the receiver operating curve (ROC) of 0.75, thus showing an acceptable ability to predict CT. The SPSS v17.0 package was used for statistical analysis.

**Table 2.** Targeted antibiotic regimens used for the treatment of MDRAB

| Targeted treatment                                   | Patients, n (%) | Crude 30 day mortality, n (%) |
|------------------------------------------------------|-----------------|-------------------------------|
| MT                                                   | 68              | 16 (23.5)                     |
| colistin                                             | 46 (67.6)       | 12 (26.1)                     |
| carbapenem                                           | 10 (14.7)       | 0 (0)                         |
| tigecycline                                          | 5 (7.4)         | 1 (20)                        |
| sulbactam                                            | 5 (7.4)         | 2 (40)                        |
| tetracycline                                         | 2 (2.9)         | 1 (50)                        |
| CT                                                   | 33              | 8 (24.2)                      |
| colistin + tigecycline                               | 9 (27.3)        | 2 (22.2)                      |
| carbapenem + tigecycline                             | 4 (12.1)        | 2 (50)                        |
| colistin + carbapenem                                | 3 (9.1)         | 0 (0)                         |
| colistin + sulbactam                                 | 2 (6.1)         | 2 (100)                       |
| colistin + aminoglycoside                            | 2 (6.1)         | 0 (0)                         |
| colistin + rifampicin                                | 2 (6.1)         | 0 (0)                         |
| carbapenem + aminoglycoside                          | 2 (6.1)         | 1 (50)                        |
| tigecycline + rifampicin                             | 2 (6.1)         | 0 (0)                         |
| tigecycline + aminoglycoside                         | 1 (3)           | 0 (0)                         |
| colistin + tigecycline + carbapenem + aminoglycoside | 3 (9.1)         | 0 (0)                         |
| colistin + tigecycline + aminoglycoside              | 2 (6.1)         | 0 (0)                         |
| tigecycline + carbapenem + rifampicin                | 1 (3)           | 1 (100)                       |

## Results

*A. baumannii* was isolated from 246 patients during the study period; 150 patients were considered to have an infection; 25 were excluded because they had not received active therapy for at least 48 h, and 24 did not present with sepsis criteria. Therefore, 101 patients were included in the analysis, 68 of whom (67.3%) received MT and 33 (32.7%) CT. Baseline clinical characteristics are shown in Table 1. Sixty-eight percent of pneumonia cases were associated with mechanical ventilation.

Targeted treatments used are shown in Table 2. All survivors received at least 4 days of appropriate treatment. Seven patients received a carbapenem for isolates with an MIC of 16 mg/L combined with another active drug (three combined with tigecycline, one with colistin and three with two or three other drugs), and

were considered as receiving CT; a further five patients received a carbapenem for strains for which the MIC was  $\geq 32$  mg/L, together with another active antibiotic, and were considered as receiving MT. The dosage of colistin used was the standard at that time (2 MU every 8 h, with adjustment according to renal function) in all but three patients, who received 3 MU every 8 h. Median duration of targeted treatment among survivors was 12 days (IQR 8–17).

Crude 30 day mortality was 23.5% (16/68) in the MT group and 24.2% (8/33) in the CT group (RR=1.03; 95% CI 0.49–2.16;  $P=0.94$ ) (Table 2). Crude 14 day mortality was 14.7% (10/68) and 15.2% (5/33), respectively (RR=1.03; 95% CI 0.38–2.77;  $P=0.95$ ). The variables associated with 30 day mortality are shown in Table 3. Multivariate Cox regression analyses are shown in Table 4. Model 1 showed a  $P$  value of 0.22 by the Hosmer–Lemeshow goodness-of-fit test, with area under the ROC of 0.77.

**Table 3.** Univariate analysis of variables associated with 30 day mortality

| Variable                                                   | Deaths/number exposed (%) | RR (95% CI)       | $P$   |
|------------------------------------------------------------|---------------------------|-------------------|-------|
| Age-weighted Charlson comorbidity index                    |                           |                   |       |
| <5                                                         | 9 (14.5)                  | reference         |       |
| $\geq 5$                                                   | 15 (38.5)                 | 2.64 (1.29–5.46)  | 0.006 |
| Type of infection                                          |                           |                   |       |
| urinary tract                                              | 0                         | reference         |       |
| upper respiratory tract                                    | 4 (40)                    | 4 (0.53–29.80)    | 0.43  |
| lower respiratory tract                                    | 14 (27.5)                 | 2.74 (0.40–18.57) | 0.59  |
| skin and soft tissue                                       | 3 (25)                    | 2.5 (0.30–20.45)  | 0.56  |
| abdominal                                                  | 2 (25)                    | 2.5 (0.27–22.86)  | 0.30  |
| Bacteraemia                                                |                           |                   |       |
| no                                                         | 13 (22)                   | reference         |       |
| yes                                                        | 11 (26.2)                 | 1.18 (0.59–2.39)  | 0.63  |
| Type of infection according to mortality risk <sup>a</sup> |                           |                   |       |
| low                                                        | 7 (19.4)                  | reference         |       |
| high                                                       | 17 (26.2)                 | 1.34 (0.62–2.94)  | 0.45  |
| Pitt score                                                 |                           |                   |       |
| <3                                                         | 5 (11.6)                  | reference         |       |
| $\geq 3$                                                   | 19 (32.8)                 | 2.81 (1.14–6.94)  | 0.01  |
| Present ICU admission                                      |                           |                   |       |
| no                                                         | 7 (18.4)                  | reference         |       |
| yes                                                        | 17 (27)                   | 1.46 (0.67–3.20)  | 0.33  |
| Polymicrobial infection                                    |                           |                   |       |
| no                                                         | 11 (19.3)                 | reference         |       |
| yes                                                        | 13 (29.5)                 | 1.53 (0.76–3.08)  | 0.23  |
| XDR <i>A. baumannii</i>                                    |                           |                   |       |
| no                                                         | 23 (24)                   | 1.19 (0.20–7.17)  |       |
| yes                                                        | 1 (20)                    | reference         | 0.66  |
| Empirical treatment                                        |                           |                   |       |
| inadequate                                                 | 8 (15.1)                  | reference         |       |
| adequate                                                   | 16 (33.3)                 | 2.20 (1.03–4.69)  | 0.03  |
| Targeted treatment                                         |                           |                   |       |
| MT                                                         | 16 (23.5)                 | reference         |       |
| CT                                                         | 8 (24.2)                  | 1.03 (0.49–2.16)  | 0.94  |

<sup>a</sup>High-risk types of infection included pneumonia, intra-abdominal infection and any bacteraemic infection.

The variable 'type of infection' was explored in different ways (low- and high-risk types, one specific type versus the rest, etc.), and the results did not differ significantly. Considering all resistant isolates as being classified as MT, the results of Cox regression did not change significantly. Using multivariate model 1, the results were as follows: 14 day mortality, HR 1.5 (95% CI 0.39–5.72),  $P=0.55$ ; 30 day mortality, HR 1.1 (95% CI 0.40–2.90),  $P=0.87$ .

Finally, we also analysed the impact of CT on 30 day mortality in the following subgroups (HR and 95% CI for mortality with CT are shown): ICU patients, HR=1.25; 95% CI 0.39–4.00;  $P=0.71$ ; patients with pneumonia, HR=1.24; 95% CI 0.32–4.984;  $P=0.76$ ; high-risk types of infection, HR=1.24; 95% CI 0.32–4.84;  $P=0.76$ ; and polymicrobial infection, HR=3.48; 95% CI 0.73–16.67;  $P=0.12$ .

## Discussion

Whether in the crude analysis or after controlling for confounders, we were unable to find any benefit from using CT rather than MT to treat sepsis caused by MDRAB, or alternatively any trend towards a reduced risk of mortality. Similarly, meta-analyses of clinical

studies have so far failed to demonstrate any benefit for CT over MT when fully active first-line drugs are used.<sup>28,29</sup> This situation may be different for Gram-negatives showing resistance to all first-line drugs; to take an example, retrospective studies of patients with bacteraemia due to KPC-producing *Klebsiella pneumoniae* showed improved survival when treated with CT compared with MT.<sup>30,31</sup>

With respect to MDRAB, the activity of different combinations has been evaluated in many *in vitro* studies and animal models,<sup>32</sup> although the applicability of the results is doubtful, because the effect of combinations may be strain dependent. However, the potential difference in the effect of combinations according to strains should also be considered in clinical studies. One recent retrospective cohort study found higher mortality among patients treated with colistin MT compared with CT in the crude analysis, although multivariate analysis was not reported.<sup>33</sup> Two randomized controlled trials were recently published that compared colistin versus colistin plus rifampicin in the treatment of ventilator-associated pneumonia<sup>34</sup> and diverse serious infections,<sup>35</sup> although the microbiological eradication rate improved with CT, mortality and cure rates did not. The colistin dose used

**Table 4.** Multivariate Cox regression models for the impact of CT on 30 day mortality; the PS for CT was included in the models

|                                                    | HR (95% CI)      | P     |
|----------------------------------------------------|------------------|-------|
| <b>Model 1</b>                                     |                  |       |
| CT                                                 | 1.35 (0.53–3.44) | 0.53  |
| age-weighted Charlson comorbidity index (per unit) | 1.19 (1.04–1.47) | 0.009 |
| adequate empirical treatment                       | 0.55 (0.23–1.33) | 0.19  |
| Pitt score (per unit)                              | 1.15 (1.02–1.29) | 0.02  |
| <b>Model 2</b>                                     |                  |       |
| CT                                                 | 1.43 (0.56–3.67) | 0.45  |
| age-weighted Charlson comorbidity index (per unit) | 1.23 (1.07–1.42) | 0.003 |
| adequate empirical treatment                       | 0.45 (0.17–1.14) | 0.09  |
| Pitt score (per unit)                              | 1.17 (1.04–1.34) | 0.009 |
| bacteraemia                                        | 2.15 (0.79–5.84) | 0.13  |
| <b>Model 3</b>                                     |                  |       |
| CT                                                 | 1.32 (0.52–3.35) | 0.56  |
| age-weighted Charlson comorbidity index (per unit) | 1.18 (1.04–1.34) | 0.009 |
| Pitt score (per unit)                              | 1.17 (1.05–1.32) | 0.006 |
| <b>Model 4</b>                                     |                  |       |
| CT                                                 | 1.26 (0.51–3.19) | 0.60  |
| Pitt score (per unit)                              | 1.17 (1.04–1.32) | 0.008 |
| adequate empirical treatment                       | 0.55 (0.23–1.34) | 0.19  |
| <b>Model 5</b>                                     |                  |       |
| CT                                                 | 1.52 (0.59–3.92) | 0.38  |
| age-weighted Charlson comorbidity index (per unit) | 1.20 (1.06–1.37) | 0.003 |
| adequate empirical treatment                       | 0.43 (0.18–1.01) | 0.05  |
| <b>Model 6</b>                                     |                  |       |
| CT                                                 | 1.26 (0.51–3.01) | 0.62  |
| high-risk source <sup>a</sup>                      | 1.70 (0.58–4.97) | 0.33  |
| adequate empirical treatment                       | 0.46 (0.18–1.21) | 0.12  |
| Pitt score (per unit)                              | 1.20 (1.06–1.35) | 0.004 |

<sup>a</sup>Pneumonia, bacteraemia and intra-abdominal infection.

in both studies was, as in ours, lower than is presently recommended according to pharmacokinetic/pharmacodynamic studies;<sup>36</sup> an ongoing clinical trial aims to clarify this aspect.<sup>37</sup>

The patients included in our study fitted the general profile of those suffering from *A. baumannii* infections.<sup>2,38</sup> The fact that we included different types of infection made it necessary to control for their effect in the analysis, although it does illustrate the clinical situations that doctors face in actual practice. We included a PS to further control for potential variables that influence the selection of CT. Finally, the study of different patient subgroups showed no trend towards outcome differences between MT and CT.

The high rate of inappropriate empirical treatment should be highlighted. The prognostic impact of appropriate empirical therapy has been described previously and may depend on many variables, including dosage, severity of presentation, source and early source control.<sup>15,16,39</sup> Curiously, the mortality rate of patients who received appropriate empirical treatment was higher in the univariate analysis of our cohort, although the association was reversed in multivariate analysis, indicating the important effect of confounding variables.

In our analysis, we considered any bitherapy that included a carbapenem when the MIC for the strain was  $\leq 16$  mg/L as CT, according to *in vitro* synergy data between carbapenems and other antibiotics only when the MIC was in that range,<sup>17,18</sup> as well as data from clinical studies.<sup>15,16</sup> However, more data are needed to determine the impact of carbapenems on infections caused by low-level resistant MDRAB isolates.

This study has several limitations. First, as previously stated, it includes several types of infection. Secondly, the CT group was made up of multiple combinations. We did not study other aspects, such as development of resistance or safety. Finally, the sample size may have been insufficient to show any trends in the efficacy of CT or MT, although these data would be useful if additional data from future studies were merged into a meta-analysis. The strengths of the study include the prospective nature of the design, the application of strict criteria when allocating patients to treatment groups, and the use of a PS.

In conclusion, this study was unable to demonstrate clinical or statistically significant differences for preferring MT or CT in the treatment of infections caused by MDRAB. Further studies are needed to better define the potential advantages and disadvantages of CT for these infections. Meanwhile, it seems reasonable to use MT, at least in patients with less severe infections.

## Acknowledgements

### Other members of the GEIH/REIPI-Ab2010 Group

Antonio Sánchez Porto, Luis Vallejo (Hospital SAS La Línea), Begoña Fernández Pérez, José Carlos Villar Chao (Complejo Hospitalario de Ourense), Belén Padilla Ortega, Emilia Cercedo Mansilla (Hospital Gregorio Marañón), José Javier García Irure (Hospital de Navarra), Alfonso del Arco Jiménez, Javier de la Torre Lima (Hospital Costa del Sol-Marbella), Concepción Gimeno Cardona, Vicente Abril (Hospital General de Valencia), Joseph Vilaró Pujals, Marian Navarro Aguirre (Consorci Hospitalari de Vic), José Antonio Jiménez Alfaro, Carlos Reviejo Jaca (Policlínica Guipúzkoa), Pilar Marín Casanova, Francisca Guerrero (Hospital Puerta del Mar), Teresa Nebreda Mayoral, María José Fernández

Calavia (Complejo Hospitalario de Soria), Esperanza Merino de Lucas, Alfredo Zorraquino (Hospital Universitario de Alicante), Eugenio Garduño Eserverri, Luis López Sánchez (Hospital Infanta Cristina), Ana Fleites Gutiérrez, Azucena Rodríguez Guardado (Hospital Universitario Central de Asturias), José María García-Arenzana Anguera (Hospital Donostia), Serafín López Palmero, Manuel Rodríguez Maresca (Complejo Hospitalario Torrecárdenas), Fernando García Garrote, José Varela Otero (Complejo Hospitalario Xeral-Calde Lugo), Elisa Vidal Verdú, Fernando Rodríguez López (Hospital Universitario Reina Sofía de Córdoba), Fernanda Pardo Sánchez, E. Ferrer Vizoso (Hospital Universitario Santiago Compostela), Mercé Gurgui, Roser Pericas (Hospital Sant Pau), Pedro María Olaechea Astigarraga, Rafael Ayarza Igartua (Hospital Galdakao-Usansolo), María Dolores Maciá Romero, Enrique Ruiz de Gopegui Bordes (Hospital Son Dureta), María Isabel Sánchez Romero (Hospital Puerta de Hierro), Jesús García Mata, María José Goyanes (Hospital Juan Grande), José Hernández Quero, Trinidad Escobar Lara (Hospital San Cecilio), Frederic Ballester Bastardie, Simona Iftimie (Hospital Sant Joan de Reus), María Isabel Galán Navarro, María Luz Cádiz Gurrea (Hospital de Motril), Carmen Amores Antequera, Montserrat Gómez (Hospital San Agustín), Carmina Martí Salas, Jordi Cuquet Peragosa (Hospital de Granollers), Susana Hernando Real, Pablo A. Carrero González (Hospital de Segovia), María Angeles Pallarés González, Sergio Rodríguez Fernández (Complejo Hospitalario de Pontevedra), Miquel Pujol Rojo, Fe Tubau (Hospital de Bellvitge), Enrique Nuño Alvarez, María Ortega Torres (Hospital Virgen de la Victoria de Málaga), Salvador Giner Almaraz, Elena Hortelano (Hospital Doctor Moliner), Fernando Chaves Sánchez, Ana García Reyne (Hospital 12 de Octubre), Juan Pablo Horcajada Gallego, Concha Segura (Hospital del Mar), Gema Sierra Dorado, Raquel Yano Escudero (Hospital San Agustín de Avilés), María Elena Dorta Hung and Cristóbal del Rosario Q (Complejo Hospitalario Materno Insular de Gran Canaria).

## Funding

Supported by the Ministerio de Economía y Competitividad, Instituto de Salud Carlos III – co-financed by European Development Regional Fund ‘A way to achieve Europe’ ERDF, Spanish Network for Research in Infectious Diseases (REIPI RD12/0015), and ‘Fondo de Investigaciones Sanitarias and Fondos Europeos de Desarrollo Regional-FEDER’ (PI10/00056 and PI11/02046). M. T. was financially supported by the Miguel Servet Programme (C.H.U.A Coruña and ISCIII).

## Transparency declarations

A. P. has been a consultant for Pfizer, has served as a speaker for Wyeth and Pfizer, and has received research support from Pfizer, Wyeth and Novartis. L. M.-M. has been a consultant for Pfizer, has served as speaker for Merck, Pfizer, Janssen-Cilag and Astra-Zeneca, and has received research support from Merck, Wyeth, Janssen-Cilag and Astra-Zeneca. J. R. B. has served as scientific advisor and speaker for Merck, AstraZeneca and Pfizer. All other authors: none to declare.

## References

- 1 Dijkshoorn L, Nemec A, Seifert H. An increasing threat in hospitals: multidrug-resistant *Acinetobacter baumannii*. *Nat Rev Microbiol* 2007; **5**: 939–51.
- 2 Peleg AY, Seifert H, Paterson DL. *Acinetobacter baumannii*: emergence of a successful pathogen. *Clin Microbiol Rev* 2008; **21**: 538–82.
- 3 European Centre for Disease Prevention and Control. *Annual Epidemiological Report. Reporting on 2009 Surveillance Data and 2010 Epidemic Intelligence Data*. Stockholm, Sweden: ECDC, 2011.

[http://www.ecdc.europa.eu/en/publications/publications/1111\\_sur\\_annual\\_epidemiological\\_report\\_on\\_communicable\\_diseases\\_in\\_europe.pdf](http://www.ecdc.europa.eu/en/publications/publications/1111_sur_annual_epidemiological_report_on_communicable_diseases_in_europe.pdf) (5 March 2014, date last accessed).

**4** Falagas ME, Bliziotis IA, Siempos II. Attributable mortality of *Acinetobacter baumannii* infections in critically ill patients: a systematic review of matched cohort and case-control studies. *Crit Care* 2006; **10**: R48.

**5** Kempf M, Rolain JM. Emergence of resistance to carbapenems in *Acinetobacter baumannii* in Europe: clinical impact and therapeutic options. *Int J Antimicrob Agents* 2012; **39**: 105–14.

**6** Garnacho-Montero J, Ortiz-Leyba C, Jiménez-Jiménez FJ et al. Treatment of multidrug-resistant *Acinetobacter baumannii* ventilator-associated pneumonia (VAP) with intravenous colistin: a comparison with imipenem-susceptible VAP. *Clin Infect Dis* 2003; **36**: 1111–8.

**7** Hergafi L, Bahloul M, Hakim A et al. Safety and efficacy of colistin compared with imipenem in the treatment of ventilator-associated pneumonia: a matched case-control study. *Intensive Care Med* 2007; **33**: 1162–7.

**8** Hawley JS, Murray CK, Jorgensen JH. Colistin heteroresistance in *Acinetobacter* and its association with previous colistin therapy. *Antimicrob Agents Chemother* 2008; **52**: 351–2.

**9** Andreassen S, Zalounina A, Leibovici L et al. Learning susceptibility of a pathogen to antibiotics using data from similar pathogens. *Methods Inf Med* 2009; **48**: 242–7.

**10** Yahav D, Lador A, Paul M et al. Efficacy and safety of tigecycline: a systematic review and meta-analysis. *J Antimicrob Chemother* 2011; **66**: 1963–71.

**11** Wyeth Pharmaceuticals Inc. *Tyagacil United States Package Insert*. <http://labeling.pfizer.com/showlabeling.aspx?id=491> (9 February 2014, date last accessed).

**12** Erbay A, Idil A, Gözel MG et al. Impact of early appropriate antimicrobial therapy on survival in *Acinetobacter baumannii* bloodstream infections. *Int J Antimicrob Agents* 2009; **34**: 575–9.

**13** Esterly JS, Griffith M, Qi C et al. Impact of carbapenem resistance and receipt of active antimicrobial therapy on clinical outcomes of *Acinetobacter baumannii* bloodstream infections. *Antimicrob Agents Chemother* 2011; **55**: 4844–9.

**14** Kiratisin P, Apisarnthanarak A, Kaewdaeng S. Synergistic activities between carbapenems and other antimicrobial agents against *Acinetobacter baumannii* including multidrug-resistant and extensively drug-resistant isolates. *Int J Antimicrob Agents* 2010; **36**: 243–6.

**15** Sheng WH, Wang JT, Li SY et al. Comparative in vitro antimicrobial susceptibilities and synergistic activities of antimicrobial combinations against carbapenem-resistant *Acinetobacter* species: *Acinetobacter baumannii* versus *Acinetobacter* genospecies 3 and 13TU. *Diagn Microbiol Infect Dis* 2011; **70**: 380–6.

**16** Friedman ND, Kaye KS, Stout JE et al. Health-care associated bloodstream infections in adults: a reason to change the accepted definition of community-acquired infections. *Ann Intern Med* 2002; **137**: 791–7.

**17** Garner JS, Jarvis WR, Emori TG et al. CDC definitions for nosocomial infections. *Am J Infect Control* 1988; **16**: 128–40.

**18** Park SY, Choo JW, Kwon SH et al. Risk factors for mortality in patients with *Acinetobacter baumannii* bacteremia. *Infect Chemother* 2013; **45**: 325–30.

**19** Kang CI, Kim SH, Park WB et al. Bloodstream infections caused by antibiotic-resistant gram-negative bacilli: risk factors for mortality and impact of inappropriate initial antimicrobial therapy on outcome. *Antimicrob Agents Chemother* 2005; **49**: 760–6.

**20** Charlson ME, Pompei P, Ales KL et al. A new method of classifying prognostic comorbidity in longitudinal studies: development and validation. *J Chronic Dis* 1987; **40**: 373–83.

**21** Chow JW, Fine MJ, Shlaes DM et al. *Enterobacter* bacteremia: clinical features and emergence of antibiotic resistance during therapy. *Ann Intern Med* 1991; **115**: 585–90.

**22** American College of Chest Physicians/Society of Critical Care Medicine Consensus Conference: definitions for sepsis and organ failure and guidelines for the use of innovative therapies in sepsis. *Crit Care Med* 1992; **20**: 864–74.

**23** von Elm E, Altman DG, Egger M et al. The Strengthening of Reporting of Observational Studies in Epidemiology (STROBE) statement: guidelines for reporting observational studies. *PLoS Med* 2007; **4**: e296.

**24** Felipe Fernández-Cuenca, María Tomás-Carmona, Francisco Caballero-Moyano et al. Actividad de 18 agentes antimicrobianos frente a aislados clínicos de *Acinetobacter baumannii*: segundo estudio nacional multicéntrico (proyecto GEIH-REIPI-Ab 2010). *Enferm Infecc Microbiol Clin* 2013; **31**: 4–9.

**25** Clinical and Laboratory Standards Institute. *Performance Standards for Antimicrobial Susceptibility Testing: Twentieth Informational Supplement M100-S20*. CLSI, Wayne, PA, USA, 2010.

**26** Comité de l'Antibiogramme de la Société Française de Microbiologie *Recommandations 2010*. Paris, France: Société Française de Microbiologie. [http://nosobase.chu-lyon.fr/recommandations/sfm/2010\\_antibiotiques\\_casfm.pdf](http://nosobase.chu-lyon.fr/recommandations/sfm/2010_antibiotiques_casfm.pdf) (9 February 2014, date last accessed).

**27** Magiorakos AP, Srinivasan A, Carey RB et al. Multidrug-resistant, extensively drug-resistant and pandrug-resistant bacteria: an international expert proposal for interim standard definitions for acquired resistance. *Clin Microbiol Infect* 2012; **18**: 268–81.

**28** Paul M, Lador A, Grozinsky-Glasberg S et al. Beta lactam antibiotic monotherapy versus beta lactam-aminoglycoside antibiotic combination therapy for sepsis. *Cochrane Database Syst Rev* 2014; **issue 1**: CD003344.

**29** Hu Y, Li L, Li W et al. Combination antibiotic therapy versus monotherapy for *Pseudomonas aeruginosa* bacteraemia: a meta-analysis of retrospective and prospective studies. *Int J Antimicrob Agents* 2013; **42**: 492–6.

**30** Tumbarello M, Viale P, Viscoli C et al. Predictors of mortality in bloodstream infections caused by *Klebsiella pneumoniae* carbapenemase-producing *K. pneumoniae*: importance of combination therapy. *Clin Infect Dis* 2012; **55**: 943–50.

**31** Qureshi ZA, Paterson DL, Potoski BA et al. Treatment outcome of bacteremia due to KPC-producing *Klebsiella pneumoniae*: superiority of combination antimicrobial regimens. *Antimicrob Agents Chemother* 2012; **56**: 2108–13.

**32** Garnacho-Montero J, Amaya-Villar R. Multiresistant *Acinetobacter baumannii* infections: epidemiology and management. *Curr Opin Infect Dis* 2010; **23**: 332–9.

**33** Batirel A, Balkan II, Karabay O et al. Comparison of colistin-carbapenem, colistin-sulbactam, and colistin plus other antibacterial agents for the treatment of extremely drug-resistant *Acinetobacter baumannii* bloodstream infections. *Eur J Clin Microbiol Infect Dis* 2014; doi:10.1007/s10096-014-2070-6.

**34** Aydemir H, Akduman D, Piskin N et al. Colistin vs. the combination of colistin and rifampicin for the treatment of carbapenem-resistant *Acinetobacter baumannii* ventilator-associated pneumonia. *Epidemiol Infect* 2013; **141**: 1214–22.

**35** Durante-Mangoni E, Signoriello G, Andini R et al. Colistin and rifampicin compared with colistin alone for the treatment of serious infections due to extensively drug-resistant *Acinetobacter baumannii*: a multicenter, randomized clinical trial. *Clin Infect Dis* 2013; **57**: 349–58.

**36** Roberts J, Lipman J. Closing the loop—a colistin clinical study to confirm dosing recommendations from PK/PD modelling. *Clin Infect Dis* 2012; **54**: 1727–9.

**37** Randomized, Open Label, Multicenter, Non-inferiority TRIAL to Compare Safety and Efficacy of Colistin vs. Meropenem in VAP Caused by CR-GNB. European Union FP-7-HEALTH-2011, GA: 278232. <http://www.clinicaltrials.gov/ct2/results?term=NCT01292031&Search=Search> (9 February 2014, date last accessed).

**38** Rodríguez-Baño J, Cisneros JM, Fernández-Cuenca F et al. Clinical features and epidemiology of *Acinetobacter baumannii* colonization and infection in Spanish hospitals. *Infect Control Hosp Epidemiol* 2004; **25**: 819–24.

**39** Joung MK, Kwon KT, Kang CI et al. Impact of inappropriate antimicrobial therapy on outcome in patients with hospital-acquired pneumonia caused by *Acinetobacter baumannii*. *J Infect* 2010; **61**: 212–8.
